# Supplementary material for: Synthesis of the first chiral polynuclear copper(i) complex based on (R)-1-(1-phenyl)ethyl-3-(O,O-diethylthiophosphoryl)thiourea and its characterization in the solid state and solution
Source: Royal Society of Chemistry journal article supplement (doi:10.1039/c9nj05683a), 2020-01-01
Supplement: c9nj05683a1.pdf [file c9nj05683a1.pdf]

**Electronic Supplementary Material (ESI)**  
**for New Journal of Chemistry**

***Synthesis of the first chiral polynuclear copper(I) complex based on (R)-1-(1-phenyl)ethyl-3-(O,O-diethylthiophosphoryl)thiourea and its characterization in the solid state and solution***

Kirill E. Metlushka,<sup>\*a</sup> Dilyara N. Sadkova,<sup>a</sup> Kristina A. Nikitina,<sup>a</sup> Alexander V. Pashagin,<sup>a</sup>  
Mikhail N. Khrizanforov,<sup>a</sup> Yulia H. Budnikova,<sup>a</sup> Vladimir I. Morozov,<sup>a</sup> Daut R. Islamov,<sup>b</sup>  
Shamil K. Latypov,<sup>a</sup> Olga N. Kataeva<sup>a</sup> and Vladimir A. Alfonsov<sup>a</sup>

<sup>a</sup>Arbuzov Institute of Organic and Physical Chemistry, FRC Kazan Scientific Center, Russian Academy of Sciences, Arbuzov str. 8, Kazan 420088, Russia. E-mail: [metlushka@mail.ru](mailto:metlushka@mail.ru).

<sup>b</sup>A.M. Butlerov Chemistry Institute of the Kazan Federal University, Kremlevskaya str. 18, Kazan 420008, Russia.

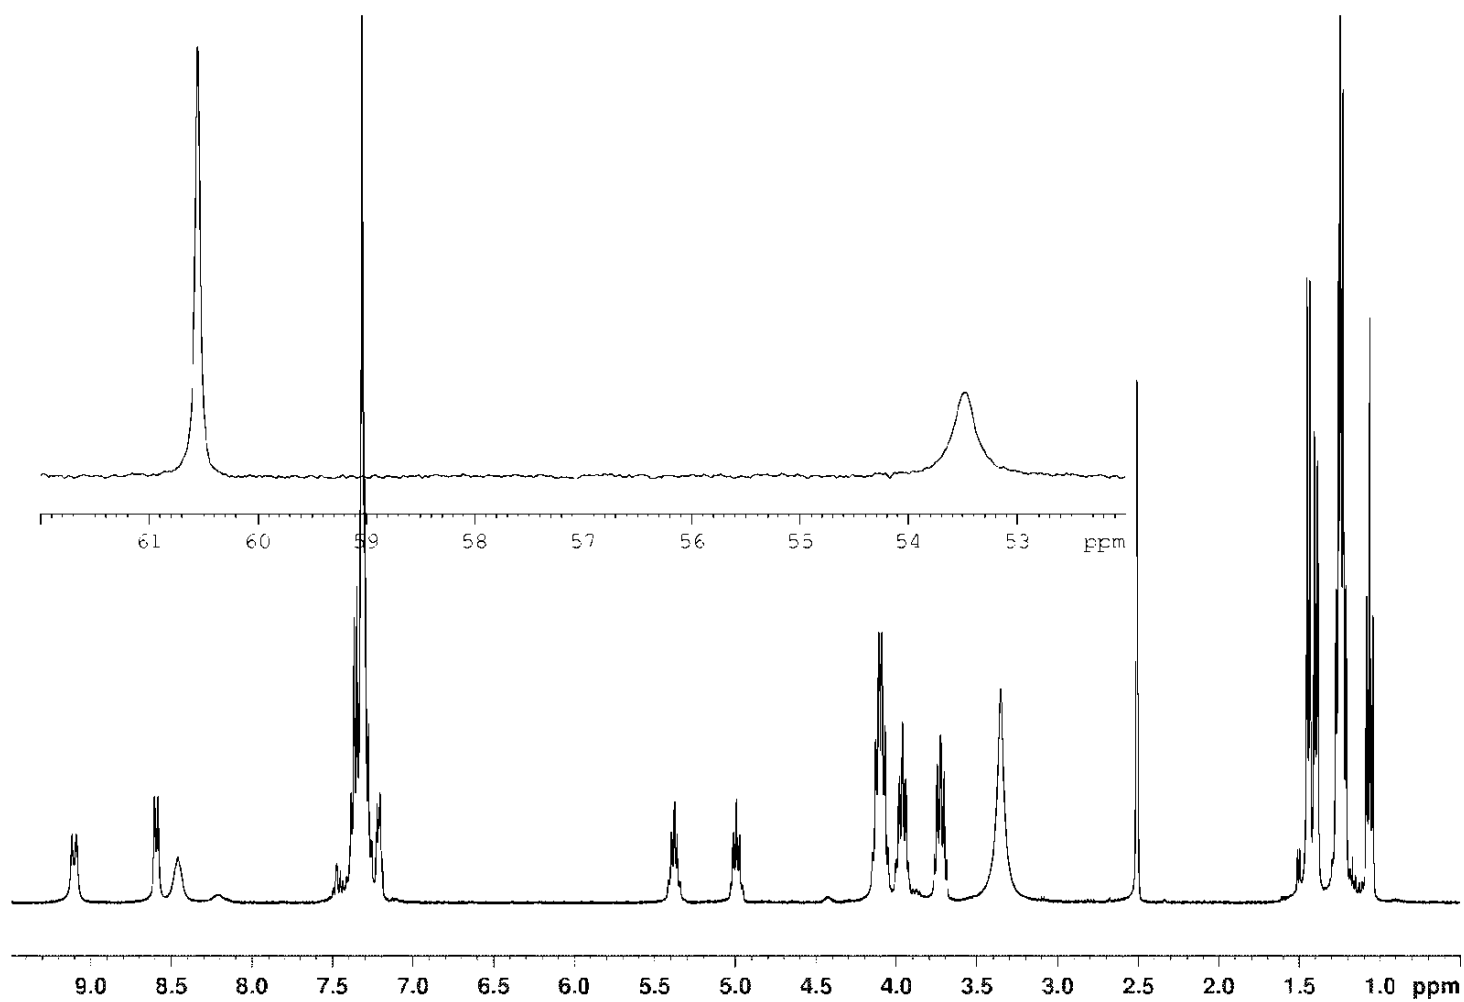

**Figure S1.** 1D  $^1\text{H}$  and  $^{31}\text{P}\{^1\text{H}\}$  NMR spectra of **1** + **HL** (1:6 molar ratio) in  $\text{DMSO-d}_6$  at  $T = 303\text{ K}$ .

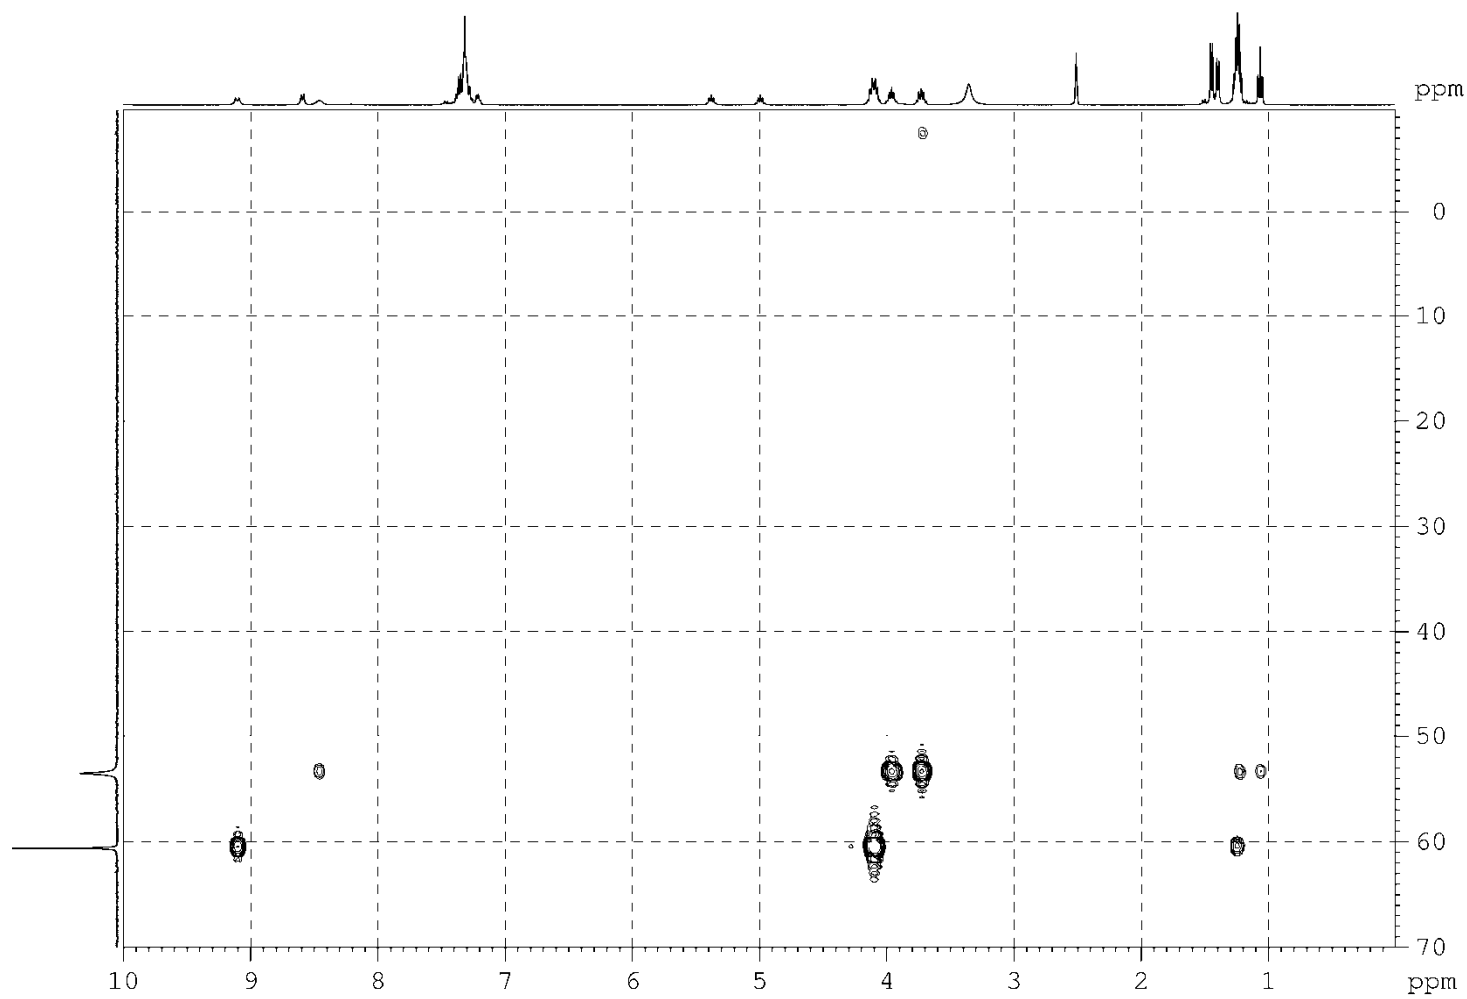

**Figure S2.** 2D  $^1\text{H}$ - $^{31}\text{P}$  HMBC NMR spectra of **1** + **HL** (1:6 molar ratio) in DMSO- $\text{d}_6$  at  $T = 303$  K.

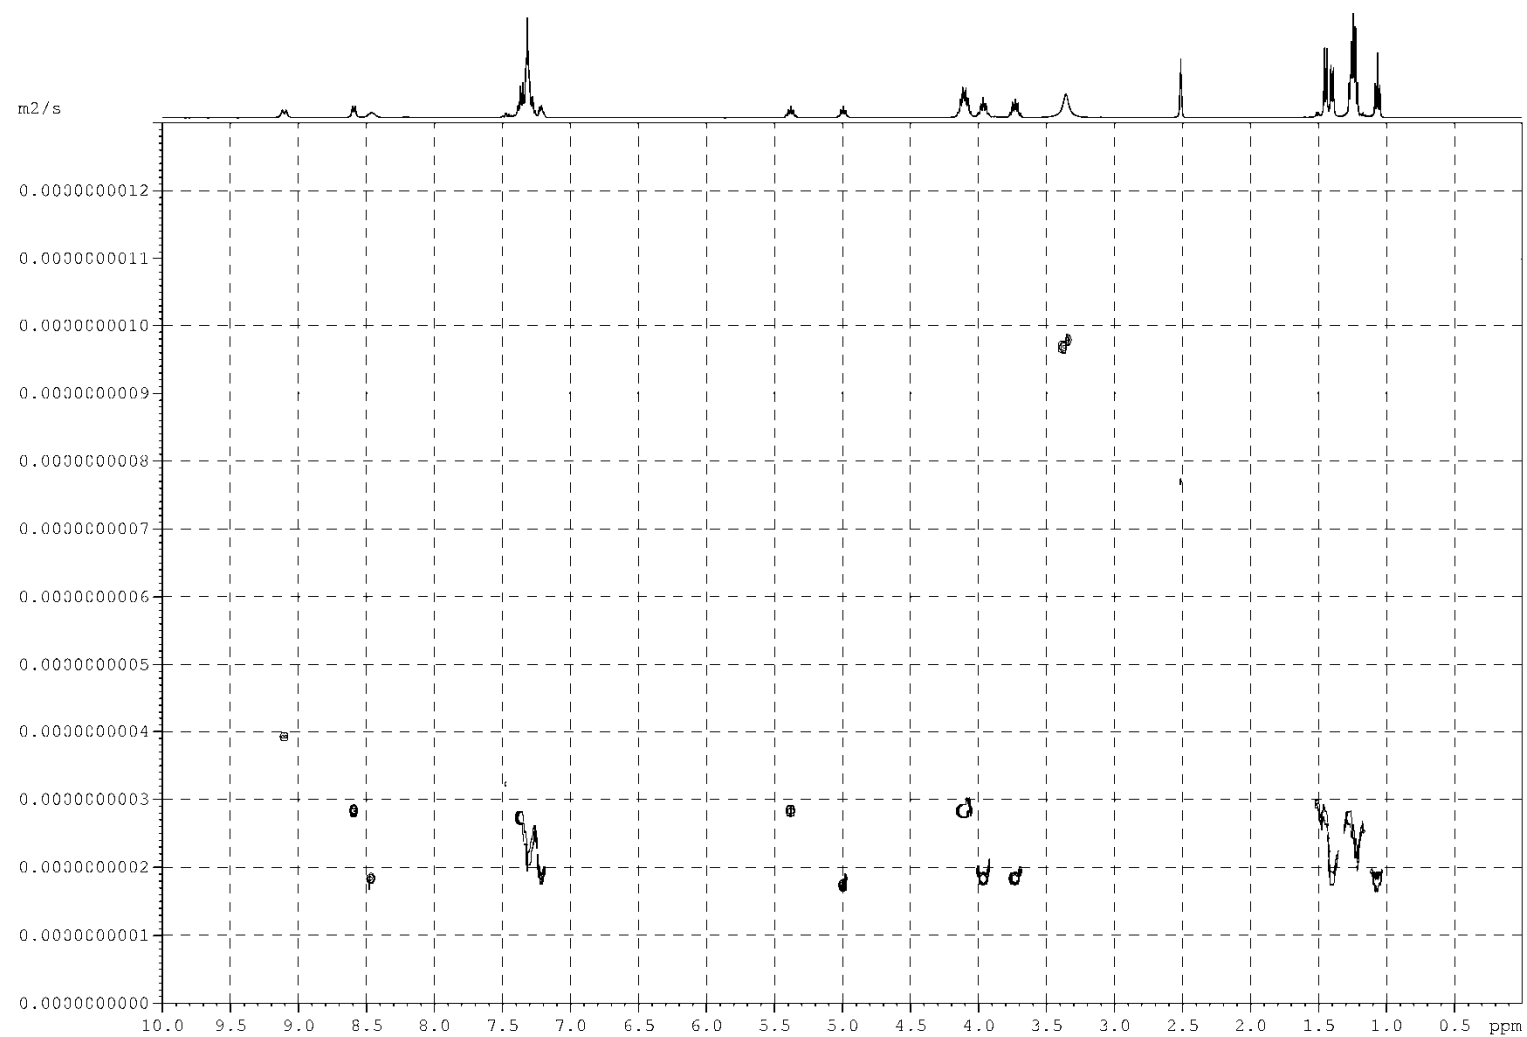

**Figure S3.** 2D  $^1\text{H}$  DOSY NMR spectra of **1** + **HL** (1:6 molar ratio) in DMSO- $\text{d}_6$  at  $T = 303\text{ K}$ .

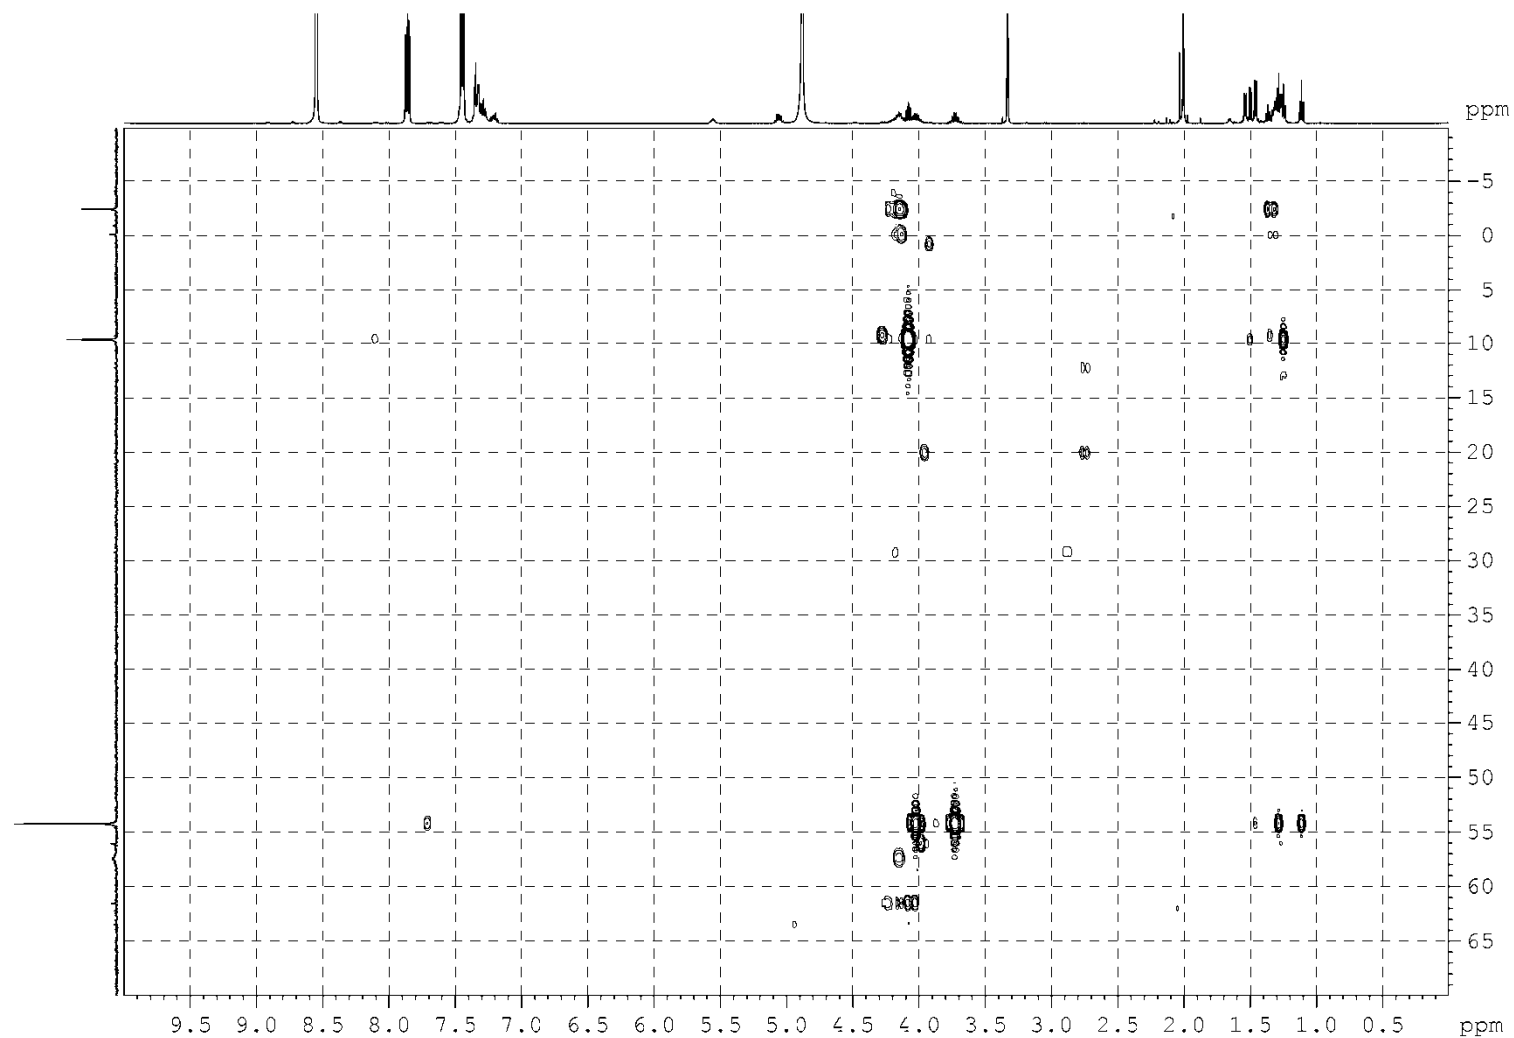

**Figure S4.** 2D  $^1\text{H}$ - $^{31}\text{P}$  HMBC NMR spectra of the reaction mixture in  $\text{CD}_3\text{OD}$  at  $T = 303\text{ K}$ .

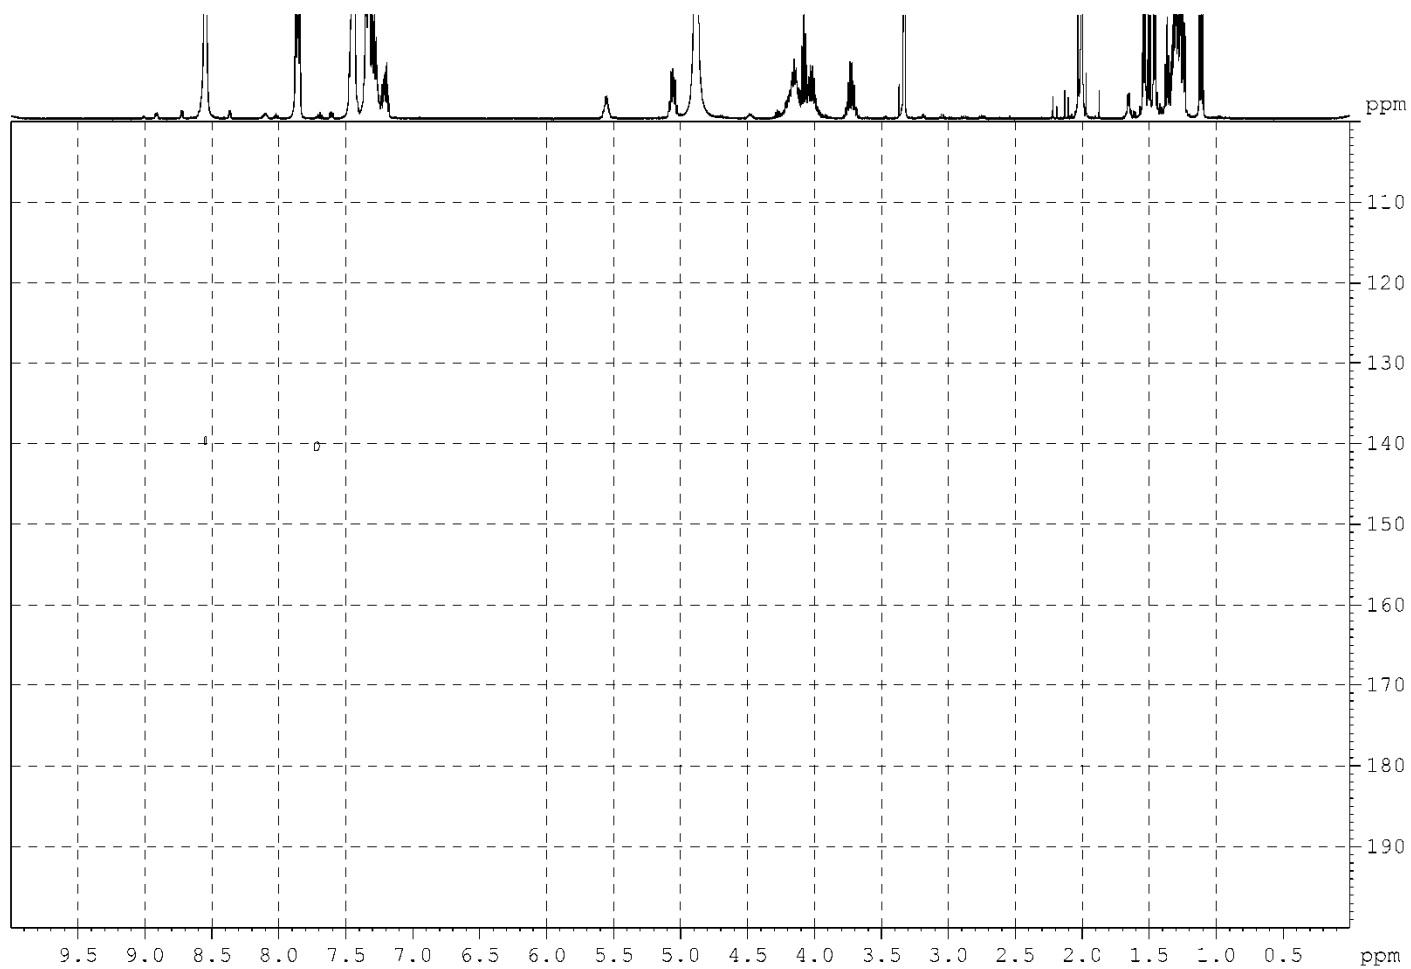

**Figure S5.** 2D  $^1\text{H}$ - $^{15}\text{N}$  HSQC NMR spectra of the reaction mixture in  $\text{CD}_3\text{OD}$  at  $T = 303\text{ K}$ .

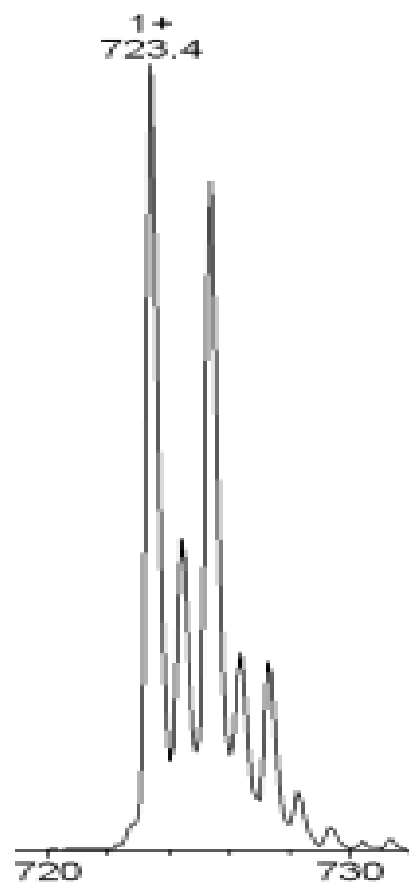

a)

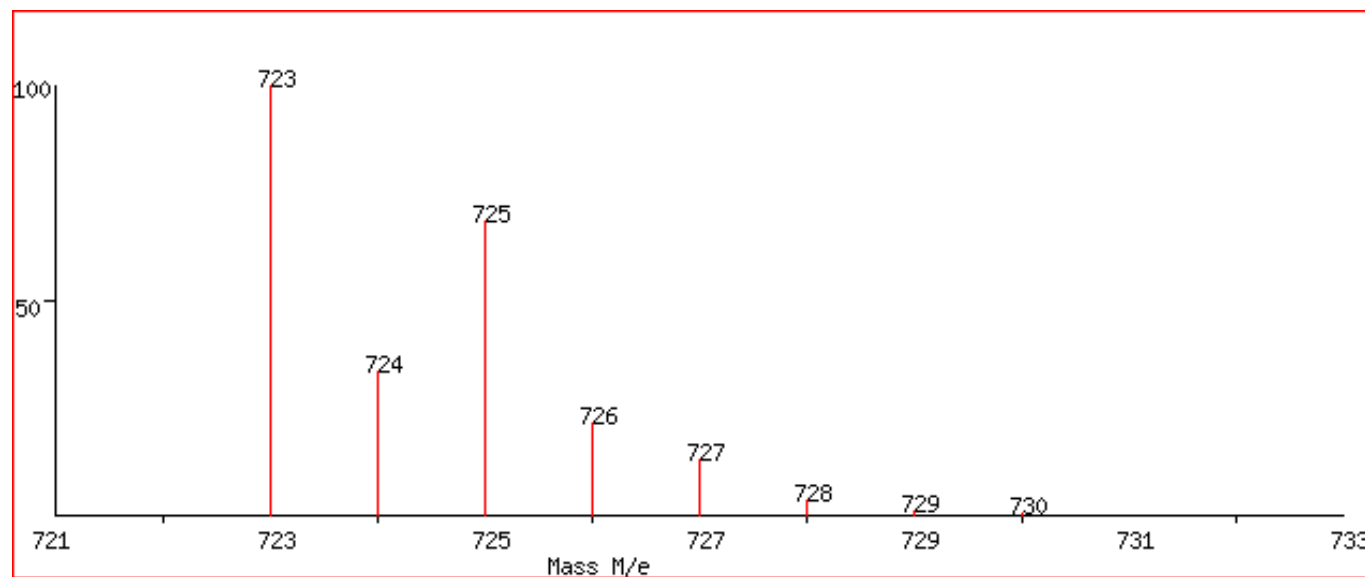

b)

**Figure S6.** a)  $[\text{CuG}]^+$  peak and b) theoretical plot.

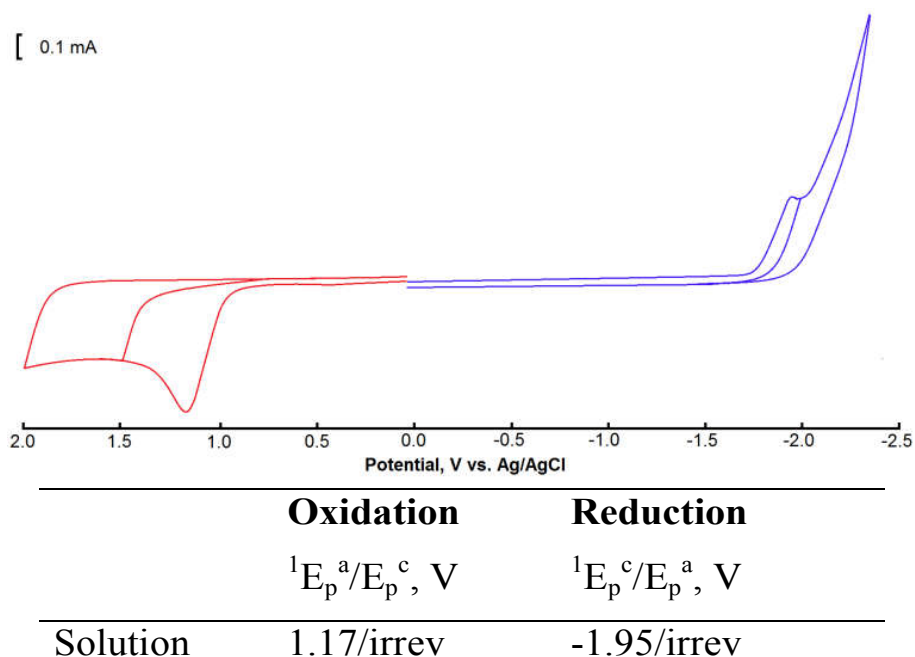

**Figure S7.** Cyclic voltammograms and electrochemical data of **HL** (5 mM). Conditions: CH<sub>3</sub>CN/0.1M Bu<sub>4</sub>NBF<sub>4</sub>, working electrode: GC; RE: Ag/AgCl.

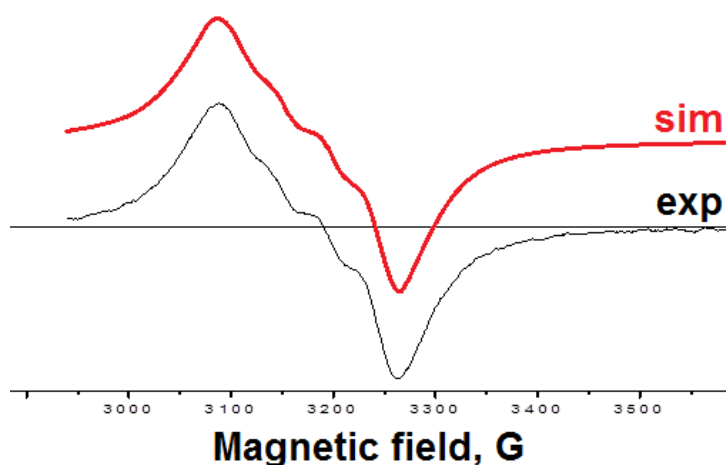

**Figure S8.** ESR spectra recorded during electrooxidation of **1**: 0.5mM in 5mL of CH<sub>3</sub>CN at 25°C at the 0.7-1.3V vs. Ag/AgCl.
